# Supplementary material for: Behavior of α, β tubulin in DMSO-containing electrolytes
Source: Royal Society of Chemistry journal article supplement (doi:10.1039/c9na00035f), 2019-01-01
Supplement: c9na00035f1.pdf [file c9na00035f1.pdf]

## ELECTRONIC SUPPLEMENTARY INFORMATION

### Behavior of $\alpha$ , $\beta$ tubulin in DMSO-containing electrolytes

Aarat P. Kalra<sup>a</sup>, Piyush Kar<sup>b</sup>, Jordane Preto<sup>a</sup>, Vahid Rezania<sup>c</sup>, Aristide Dogariu<sup>d</sup>, John D. Lewis<sup>e</sup>, Jack A. Tuszynski<sup>a,e</sup>, and Karthik Shankar<sup>b</sup>

<sup>a</sup> Department of Physics, University of Alberta, 11335 Saskatchewan Dr NW, Edmonton, Alberta T6G 2M9, Canada

<sup>b</sup> Department of Electrical and Computer Engineering, University of Alberta, 9107–116 St, Edmonton, Alberta T6G 2V4, Canada

<sup>c</sup> Department of Physical Sciences, MacEwan University, Edmonton, Alberta, T5J 4S2, Canada.

<sup>d</sup> CREOL, The College of Optics and Photonics, University of Central Florida, Orlando, FL 32816, USA.

<sup>e</sup> Department of Oncology, University of Alberta, Edmonton, Alberta, T6G 1Z2, Canada.

| DMSO % (v/v)                  | Parameter $y_0$<br>(nm) |       | Parameter $x_c$<br>(nm) |         | Parameter $A$ (nm <sup>2</sup> ) |       | Parameter $w$ (nm) |       | Reduced<br>Chi-Sqr | Adj. R-<br>Square |
|-------------------------------|-------------------------|-------|-------------------------|---------|----------------------------------|-------|--------------------|-------|--------------------|-------------------|
|                               | Value                   | SE    | Value                   | SE      | Value                            | SE    | Value              | SE    |                    |                   |
| <b>Number distribution</b>    |                         |       |                         |         |                                  |       |                    |       |                    |                   |
| <b>0</b>                      | 0.440                   | 0.277 | 7.038                   | 0.07031 | 68.099                           | 3.619 | 3.306              | 0.176 | 1.425              | 0.957             |
| <b>5</b>                      | 0.049                   | 0.267 | 9.459                   | 0.0684  | 104.167                          | 4.401 | 3.922              | 0.170 | 1.432              | 0.971             |
| <b>10</b>                     | 0.022                   | 0.266 | 10.784                  | 0.064   | 120.210                          | 4.701 | 3.883              | 0.157 | 1.518              | 0.975             |
| <b>15</b>                     | 0.042                   | 0.260 | 11.641                  | 0.069   | 129.220                          | 4.991 | 4.220              | 0.169 | 1.449              | 0.976             |
| <b>20</b>                     | 0.018                   | 0.261 | 13.15                   | 0.077   | 148.179                          | 5.663 | 4.773              | 0.190 | 1.467              | 0.976             |
| <b>Volume distribution</b>    |                         |       |                         |         |                                  |       |                    |       |                    |                   |
| <b>0</b>                      | 0.208                   | 0.278 | 8.178                   | 0.094   | 81.773                           | 4.525 | 4.656              | 0.246 | 1.165              | 0.957             |
| <b>5</b>                      | -0.003                  | 0.271 | 10.457                  | 0.091   | 114.040                          | 5.276 | 4.965              | 0.229 | 1.349              | 0.967             |
| <b>10</b>                     | -0.025                  | 0.239 | 11.536                  | 0.072   | 126.503                          | 4.767 | 4.608              | 0.178 | 1.175              | 0.977             |
| <b>15</b>                     | -0.001                  | 0.248 | 12.436                  | 0.083   | 134.199                          | 5.346 | 5.031              | 0.206 | 1.25               | 0.974             |
| <b>20</b>                     | -0.033                  | 0.236 | 14.036                  | 0.086   | 154.134                          | 5.691 | 5.611              | 0.213 | 1.139              | 0.977             |
| <b>Intensity distribution</b> |                         |       |                         |         |                                  |       |                    |       |                    |                   |
| <b>0</b>                      | 0.109                   | 0.116 | 10.527                  | 0.194   | 29.376                           | 2.520 | 6.593              | 0.524 | 0.170              | 0.912             |
| <b>5</b>                      | -0.025                  | 0.053 | 12.105                  | 0.091   | 31.476                           | 1.223 | 6.010              | 0.230 | 0.049              | 0.977             |
| <b>10</b>                     | -0.016                  | 0.031 | 12.433                  | 0.064   | 21.009                           | 0.666 | 4.847              | 0.159 | 0.020              | 0.983             |
| <b>15</b>                     | -0.020                  | 0.049 | 13.856                  | 0.089   | 31.611                           | 1.189 | 5.772              | 0.222 | 0.048              | 0.977             |
| <b>20</b>                     | -0.025                  | 0.045 | 15.113                  | 0.077   | 37.259                           | 1.173 | 5.872              | 0.190 | 0.043              | 0.983             |

**Table S1** A schematic displaying the variation of all Gaussian fit parameters for equation (1), with Standard Errors (SE) with increasing DMSO concentration.

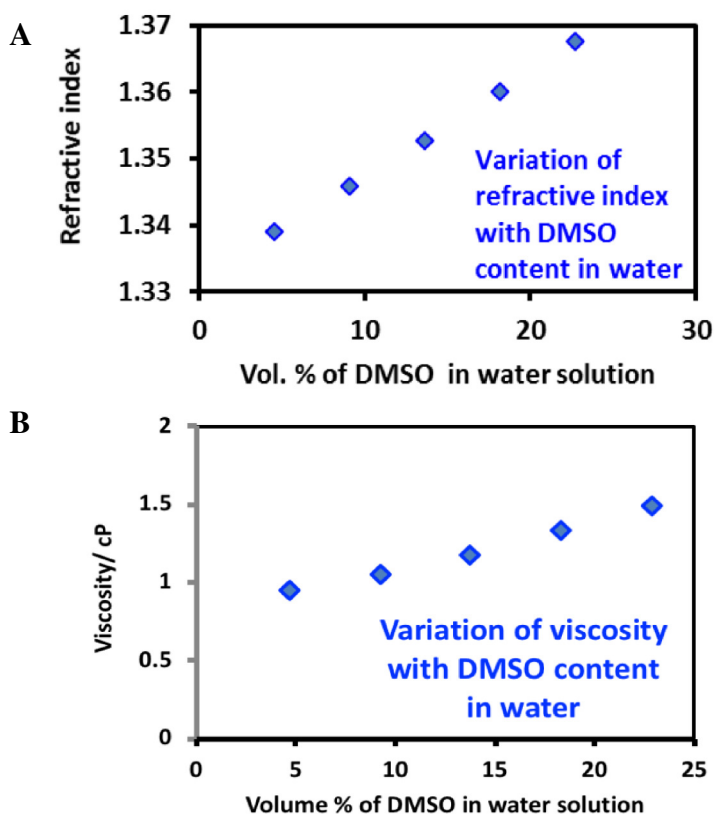

**Fig. S1** (A) Variation of viscosity and (B) refractive index with increasing DMSO volume fractions in water.
